# Supplementary material for: Revisiting Steroidogenic Pathways in the Human Placenta and Primary Human Trophoblast Cells
Source: PubMed Central journal article supplement (PMC7915605; doi:10.3390/ijms22041704), 2021-02-08
Supplement: ijms-22-01704-s001.pdf [file ijms-22-01704-s001.pdf]

# Revisiting steroidogenic pathways in the human placenta and primary human trophoblast cells

## SUPPLEMENTARY INFORMATION

**Table S1:** List of predesigned probe assays used in qPCR and ddPCR analysis. All primers were obtained from Thermo Fisher Scientific, Waltham, MA, USA, except the HEX assay, which was obtained from BioRad, Hercules, CA, USA.

| Gene symbol            | Gene aliases                                                                | Assay ID             |
|------------------------|-----------------------------------------------------------------------------|----------------------|
| <i>CYP11A1</i>         | Cholesterol Desmolase, P450SCC                                              | Hs00167984_m1        |
| <i>CYP11B1</i>         | Steroid 11-Beta-Hydroxylase, Cytochrome P450C11                             | Hs01596406_gH        |
| <i>CYP17A1</i>         | Steroid 17-Alpha-Monooxygenase, Cytochrome P450c17                          | Hs01124136_m1        |
| <i>CYP19A1</i>         | Aromatase, P-450AROM, Estrogen Synthase                                     | Hs00903411_m1        |
| <i>CYP21A2</i>         | Steroid 21-Monooxygenase, Steroid 21-Hydroxylase, 21-OHase                  | Hs00416901_g1        |
| <i>HSD3B1</i>          | Delta-5-3-Ketosteroid Isomerase                                             | Hs04194787_g1        |
| <i>HSD11B1</i>         | Hydroxysteroid 11-Beta Dehydrogenase 1                                      | Hs01547870_m1        |
| <i>HSD11B2</i>         | Hydroxysteroid 11-Beta Dehydrogenase 2                                      | Hs00388669_m1        |
| <i>HSD17B1</i>         | Hydroxysteroid 17-Beta Dehydrogenase 1                                      | Hs00166219_g1        |
| <i>AKR1C2</i>          | Aldo-Keto Reductase Family 1 Member C2                                      | Hs04194036_gH        |
| <i>AKR1C3</i>          | Aldo-Keto Reductase Family 1 Member C3                                      | Hs00366267_m         |
| <i>SRD5A1</i>          | Steroid 5 Alpha-Reductase 1                                                 | Hs00971645_g1        |
| <b>Reference genes</b> |                                                                             |                      |
| <i>TBP</i>             | TATA-box binding protein                                                    | Hs00427620_m1        |
| <i>YWHAZ</i>           | tyrosine 3-monooxygenase/tryptophan 5-monooxygenase activation protein zeta | Hs01122445_g1        |
| <i>B2M</i>             | beta-2-microglobulin                                                        | dHsaCPE5053101 (HEX) |
